# Supplementary material for: Peptidoglycan Hydrolases RipA and Ami1 Are Critical for Replication and Persistence of Mycobacterium tuberculosis in the Host
Source: PubMed Central journal article supplement (PMC7064781; doi:10.1128/mbio.03315-19), 2020-03-03
Supplement: mBio.03315-19-st001.pdf [file mBio.03315-19-st001.pdf]

**Table S1. List of strains used in this study**

|                                                             | <b>Genotype</b>                                                        | <b>Source</b>         |
|-------------------------------------------------------------|------------------------------------------------------------------------|-----------------------|
| <b>H37Rv</b>                                                | H37Rv, wild type                                                       | Gift from C. Sassetti |
| <b><math>\Delta</math>ami1</b>                              | $\Delta$ ami1::hygR                                                    | This study            |
| <b><math>\Delta</math>ami1::ami1<sup>WT</sup></b>           | $\Delta$ ami1::hygR::pGMCK-Pnat-ami1                                   | This study            |
| <b><math>\Delta</math>ami1::ami1<sup>E200A</sup></b>        | $\Delta$ ami1::hygR::pGMCK-Pnat-ami1 <sup>E200A</sup>                  | This study            |
| <b>WT::ripAB</b>                                            | pGMCK-P1-ripA-ripB                                                     | This study            |
| <b><math>\Delta</math>ripAB::ripAB</b>                      | $\Delta$ ripAB::zeoR::pGMCS-P1-ripA-ripB                               | This study            |
| <b><math>\Delta</math>ripA</b>                              | $\Delta$ ripAB::zeoR::pGMCK-P1-ripB                                    | This study            |
| <b><math>\Delta</math>ripB</b>                              | $\Delta$ ripAB::zeoR::pGMCK-P1-ripA                                    | This study            |
| <b><math>\Delta</math>ripA::ripA</b>                        | $\Delta$ ripAB::zeoR::pGMCK-P1-ripB; Giles: pGMCgS-P1-ripA             | This study            |
| <b><math>\Delta</math>ami1::ripAB</b>                       | $\Delta$ ami1::hygR pGMCK-P1-ripA-ripB                                 | This study            |
| <b><math>\Delta</math>ami1<math>\Delta</math>ripA</b>       | $\Delta$ ami1::hygR $\Delta$ ripAB::zeoR::pGMCK-P1-ripB                | This study            |
| <b><math>\Delta</math>ami1<math>\Delta</math>ripA::ripA</b> | $\Delta$ ami1::hygR $\Delta$ ripAB::zeoR::pGMCK-P1-ripB pGMCgS-P1-ripA | This study            |
| <b><math>\Delta</math>ami1<math>\Delta</math>ripB</b>       | $\Delta$ ami1::hygR $\Delta$ ripAB::zeoR::pGMCK-P1-ripA                | This study            |
| <b>ripA-TetOFF</b>                                          | $\Delta$ ripAB::zeoR::pGMCK-P1-ripB, Giles: pGMCgS-T38S38-P750-ripA-HA | This study            |
