# Supplementary material for: Peptidoglycan Hydrolases RipA and Ami1 Are Critical for Replication and Persistence of Mycobacterium tuberculosis in the Host
Source: PubMed Central journal article supplement (PMC7064781; doi:10.1128/mbio.03315-19), 2020-03-03
Supplement: mBio.03315-19-st002.pdf [file mBio.03315-19-st002.pdf]

**Table S2. Plasmids used in this study**

| <b>Name</b>                                   | <b>Description</b>                                                                 | <b>Integration site</b> | <b>Resistance</b> |
|-----------------------------------------------|------------------------------------------------------------------------------------|-------------------------|-------------------|
| <b>pGMCK-<i>Pnat-ami1</i><sub>WT</sub></b>    | Expression of <i>ami1</i> from native promoter                                     | L5                      | Kan               |
| <b>pGMCK-<i>Pnat-ami1</i><sub>E200A</sub></b> | Expression of <i>ami1</i> <sub>E200A</sub> (inactive amidase) from native promoter | L5                      | Kan               |
| <b>pGMCS-<i>P1-ripA-ripB</i></b>              | Expression of <i>ripA</i> and <i>ripB</i> from Pmyc1-tetO constitutive promoter    | L5                      | Strep             |
| <b>pGMCK-<i>P1-ripA-ripB</i></b>              | Expression of <i>ripA</i> and <i>ripB</i> from Pmyc1-tetO constitutive promoter    | L5                      | Kan               |
| <b>pGMCK-<i>P1-ripA</i></b>                   | Expression of <i>ripA</i> from Pmyc1-tetO constitutive promoter                    | L5                      | Kan               |
| <b>pGMCK-<i>P1-ripB</i></b>                   | Expression of <i>ripB</i> from Pmyc1-tetO constitutive promoter                    | L5                      | Kan               |
| <b>pTC-MCS</b>                                | empty vector                                                                       | L5                      | Kan               |
| <b>pGMCgS-<i>P1-ripA</i></b>                  | Expression of <i>ripA</i> from Pmyc1-tetO constitutive promoter                    | Giles                   | Strep             |
| <b>pGMCgS-<i>T38S38-P750-ripA-HA</i></b>      | Transcriptional repression of <i>ripA</i> with atc (TetOFF)                        | Giles                   | Strep             |
